# Supplementary material for: Multimodal EEG-fNIRS Classification as a Clinical Tool for Bipolar Disorder Diagnosis
Source: Research Square preprint supplement (doi:10.21203/rs.3.rs-6768170/v1), 2025-06-09
Supplement: Supplementary file 1 [file b061bf5cea8a768a7a283f34.docx]

**SUPPLEMENTARY DATA**

**Table 1.****Participants’ characteristics.**

|  | **BP I** | | **BP II** | | **HC** |
| --- | --- | --- | --- | --- | --- |
| **Depressed** | **Euthymic** | **Depressed** | **Euthymic** |
| **Age** | 43.9±14.0 | 52.3±10.4 | 43.6±12.6 | 49.7±11.8 | 32.4±14.8 |
| **Gender**  **(M / F)** | 3 / 4 | 4 / 9 | 1 / 4 | 14 / 6 | 10 / 15 |
| **MADRS** | 23.0±5.9 | 4.0±3.8 | 21.2± 5.5 | 6.6±6.1 | N/A |
| **YMRS** | 1.4±2.3 | 0.2±0.6 | 1.2±1.8 | 1.8±2.4 | N/A |
| **GAF** | 49.9±14.8 | 74.6±25.6 | 59.4±15.5 | 79.3±17.6 | N/A |

BP I = patient with bipolar disorder type I, BPII = type II and HC = healthy controls. M = male, F = female, MADRS = Montgomery–Åsberg Depression Rating Scale, YMRS = Young Mania Rating Scale, GAF = Global Assessment of Functioning, N/A = not applicable. In our cohort, a unique **BP I** subject with a manic mood state (F, 65 years old) is not included in this table.
